# Supplementary material for: Macrophages Inability to Mediate Adherent-Invasive E. coli Replication is Linked to Autophagy in Crohn’s Disease Patients
Source: PubMed Central journal article supplement (PMC6912674; doi:10.3390/cells8111394), 2019-11-05
Supplement: cells-08-01394-s001.pdf [file cells-08-01394-s001.pdf]

**Supplementary Material:** Figure S1: Western blot and quantification of LC3A/B proteins levels in MDM from CD patients (n=10), UC patients (n=11) and healthy volunteers (n=11), infected during 10h or not with AIEC LF82 bacteria. The experiment was repeated 3 times.

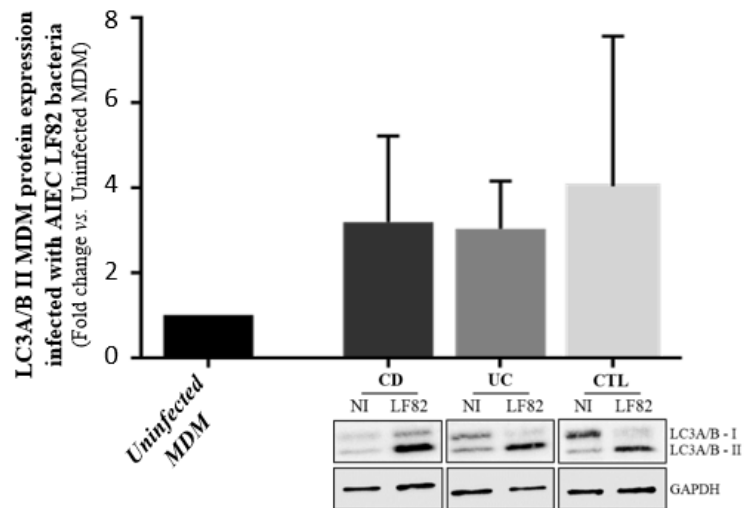

**Supplementary Figure S1.** Western blot and quantification of LC3A/B proteins levels in MDM from CD patients (n=10), UC patients (n=11) and healthy volunteers (n=11), infected during 10h or not with AIEC LF82 bacteria. The experiment was repeated 3 times.
